# Supplementary material for: Vacancy and anti-site disorder scattering in AgBiSe2thermoelectrics
Source: Royal Society of Chemistry journal article supplement (doi:10.1039/c7dt00381a), 2017-01-01
Supplement: c7dt00381a1.pdf [file c7dt00381a1.pdf]

## Supporting Information - Vacancy and anti-site disorder scattering in AgBiSe<sub>2</sub> thermoelectrics

Felix Böcher<sup>a</sup>, Sean P. Culver<sup>a</sup>, Jan Peilstöcker<sup>a</sup>, Kai S. Weldert<sup>a</sup>, Wolfgang G. Zeier<sup>\*a</sup>

<sup>a</sup>*Institute of Physical Chemistry, Justus-Liebig-University Giessen, Heinrich-Buff-  
Ring 17, D-35392 Giessen, Germany.*

Table S1. Crystallographic data (atomic coordinates, occupancy, and  $U_{\text{iso}}$ ) of AgBiSe<sub>2</sub>, obtained from Rietveld refinements of X-ray synchrotron diffraction.

| AgBiSe <sub>2</sub> structure from X-ray powder diffraction (space group $P3m1$ ) |              |        |        |            |          |                                 |
|-----------------------------------------------------------------------------------|--------------|--------|--------|------------|----------|---------------------------------|
| $a = 4.19231(8) \text{ \AA}; c = 19.6622(2) \text{ \AA}; 16.1 \% R3m$             |              |        |        |            |          |                                 |
| Fit residuals ( $R_{\text{wp}}, R_{\text{exp}}, \chi^2$ ): 12.07, 9.31, 1.68      |              |        |        |            |          |                                 |
| Atom                                                                              | Wyckoff Site | $x/a$  | $y/b$  | $z/c$      | Occ.     | $U_{\text{iso}} / \text{\AA}^2$ |
| Ag1                                                                               | 1a           | 0      | 0      | 0          | 1.00     | 0.0750                          |
| Ag2                                                                               | 2d           | 0.3333 | 0.6667 | -0.3309(2) | 0.940(1) | 0.0119(4)                       |
| Ag3                                                                               | 2d           | 0.3333 | 0.6667 | 0.1608(1)  | 0.060(1) | 0.0147(3)                       |
| Bi1                                                                               | 1b           | 0      | 0      | 0.5        | 1.00     | 0.0011(1)                       |
| Bi2                                                                               | 2d           | 0.3333 | 0.6667 | 0.1608(1)  | 0.940(1) | 0.0147(3)                       |
| Bi3                                                                               | 2d           | 0.3333 | 0.6667 | -0.3309(2) | 0.060(1) | 0.0119(4)                       |
| Se1                                                                               | 2d           | 0      | 0      | 0.2506(2)  | 1.00     | 0.0426(4)                       |
| Se2                                                                               | 2d           | 0.3333 | 0.6667 | -0.0757(2) | 1.00     | 0.0426(4)                       |
| Se3                                                                               | 2d           | 0.3333 | 0.6667 | 0.4130(3)  | 1.00     | 0.0426(4)                       |

Table S2. Crystallographic data (atomic coordinates, occupancy, and  $U_{\text{iso}}$ ) of  $\text{Ag}_{0.99}\text{BiSe}_2$ , obtained from Rietveld refinements of X-ray synchrotron diffraction.

| $\text{Ag}_{0.99}\text{BiSe}_2$ structure from X-ray powder diffraction (space group $P\bar{3}m1$ )<br>$a = 4.1907(1) \text{ \AA}$ ; $c = 19.6625(3) \text{ \AA}$ ; 15.8 % $R\bar{3}m$ ; 1.7 % $\text{Bi}_2\text{Se}_3$<br>Fit residuals ( $R_{\text{wp}}$ , $R_{\text{exp}}$ , $\chi^2$ ): 13.14, 9.99, 1.73 |              |        |        |            |          |                                 |
|---------------------------------------------------------------------------------------------------------------------------------------------------------------------------------------------------------------------------------------------------------------------------------------------------------------|--------------|--------|--------|------------|----------|---------------------------------|
| Atom                                                                                                                                                                                                                                                                                                          | Wyckoff Site | $x/a$  | $y/b$  | $z/c$      | Occ.     | $U_{\text{iso}} / \text{\AA}^2$ |
| Ag1                                                                                                                                                                                                                                                                                                           | $1a$         | 0      | 0      | 0          | 1.00     | 0.0750                          |
| Ag2                                                                                                                                                                                                                                                                                                           | $2d$         | 0.3333 | 0.6667 | -0.3312(2) | 0.980(1) | 0.0109(5)                       |
| Ag3                                                                                                                                                                                                                                                                                                           | $2d$         | 0.3333 | 0.6667 | 0.1612(1)  | 0.020(1) | 0.0107(5)                       |
| Bi1                                                                                                                                                                                                                                                                                                           | $1b$         | 0      | 0      | 0.5        | 1.00     | 0.0037(5)                       |
| Bi2                                                                                                                                                                                                                                                                                                           | $2d$         | 0.3333 | 0.6667 | 0.1612(1)  | 0.980(1) | 0.0107(5)                       |
| Bi3                                                                                                                                                                                                                                                                                                           | $2d$         | 0.3333 | 0.6667 | -0.3312(2) | 0.020(1) | 0.0109(5)                       |
| Se1                                                                                                                                                                                                                                                                                                           | $2d$         | 0      | 0      | 0.2519(2)  | 1.00     | 0.0428(5)                       |
| Se2                                                                                                                                                                                                                                                                                                           | $2d$         | 0.3333 | 0.6667 | -0.0761(3) | 1.00     | 0.0428(5)                       |
| Se3                                                                                                                                                                                                                                                                                                           | $2d$         | 0.3333 | 0.6667 | 0.4148(3)  | 1.00     | 0.0428(5)                       |

Table S3. Crystallographic data (atomic coordinates, occupancy, and  $U_{\text{iso}}$ ) of  $\text{Ag}_{0.98}\text{BiSe}_2$ , obtained from Rietveld refinements of X-ray synchrotron diffraction.

| $\text{Ag}_{0.98}\text{BiSe}_2$ structure from X-ray powder diffraction (space group $P3m1$ )<br>$a = 4.1962(1) \text{ \AA}$ ; $c = 19.6462(3) \text{ \AA}$ ; 14.9 % $R3m$<br>Fit residuals ( $R_{\text{wp}}$ , $R_{\text{exp}}$ , $\chi^2$ ): 14.27, 9.17, 2.42 |              |        |        |            |          |                                 |
|------------------------------------------------------------------------------------------------------------------------------------------------------------------------------------------------------------------------------------------------------------------|--------------|--------|--------|------------|----------|---------------------------------|
| Atom                                                                                                                                                                                                                                                             | Wyckoff Site | $x/a$  | $y/b$  | $z/c$      | Occ.     | $U_{\text{iso}} / \text{\AA}^2$ |
| Ag1                                                                                                                                                                                                                                                              | $1a$         | 0      | 0      | 0          | 1.00     | 0.0750                          |
| Ag2                                                                                                                                                                                                                                                              | $2d$         | 0.3333 | 0.6667 | -0.3304(2) | 0.987(1) | 0.0066(4)                       |
| Ag3                                                                                                                                                                                                                                                              | $2d$         | 0.3333 | 0.6667 | 0.1609(1)  | 0.013(1) | 0.0070(2)                       |
| Bi1                                                                                                                                                                                                                                                              | $1b$         | 0      | 0      | 0.5        | 1.00     | 0.0035(4)                       |
| Bi2                                                                                                                                                                                                                                                              | $2d$         | 0.3333 | 0.6667 | 0.1609(1)  | 0.987(1) | 0.0070(2)                       |
| Bi3                                                                                                                                                                                                                                                              | $2d$         | 0.3333 | 0.6667 | -0.3304(2) | 0.013(1) | 0.0066(4)                       |
| Se1                                                                                                                                                                                                                                                              | $2d$         | 0      | 0      | 0.2526(2)  | 1.00     | 0.0448(4)                       |
| Se2                                                                                                                                                                                                                                                              | $2d$         | 0.3333 | 0.6667 | -0.0754(2) | 1.00     | 0.0448(4)                       |
| Se3                                                                                                                                                                                                                                                              | $2d$         | 0.3333 | 0.6667 | 0.4154(3)  | 1.00     | 0.0448(4)                       |

Table S4. Crystallographic data (atomic coordinates, occupancy, and  $U_{\text{iso}}$ ) of  $\text{Ag}_{0.95}\text{BiSe}_2$ , obtained from Rietveld refinements of X-ray synchrotron diffraction.

| $\text{Ag}_{0.95}\text{BiSe}_2$ structure from X-ray powder diffraction (space group $P3m1$ )<br>$a = 4.19002(5) \text{ \AA}$ ; $c = 19.6563(2) \text{ \AA}$ ; 11.0 % $R3m$<br>Fit residuals ( $R_{\text{wp}}$ , $R_{\text{exp}}$ , $\chi^2$ ): 12.40, 9.35, 1.76 |              |        |        |            |      |                                 |
|-------------------------------------------------------------------------------------------------------------------------------------------------------------------------------------------------------------------------------------------------------------------|--------------|--------|--------|------------|------|---------------------------------|
| Atom                                                                                                                                                                                                                                                              | Wyckoff Site | $x/a$  | $y/b$  | $z/c$      | Occ. | $U_{\text{iso}} / \text{\AA}^2$ |
| Ag1                                                                                                                                                                                                                                                               | 1a           | 0      | 0      | 0          | 1.00 | 0.0750                          |
| Ag2                                                                                                                                                                                                                                                               | 2d           | 0.3333 | 0.6667 | -0.3312(2) | 1.00 | 0.0095(4)                       |
| Bi1                                                                                                                                                                                                                                                               | 1b           | 0      | 0      | 0.5        | 1.00 | 0.0012(3)                       |
| Bi2                                                                                                                                                                                                                                                               | 2d           | 0.3333 | 0.6667 | 0.1611(1)  | 1.00 | 0.0222(5)                       |
| Se1                                                                                                                                                                                                                                                               | 2d           | 0      | 0      | 0.2513(2)  | 1.00 | 0.0554(4)                       |
| Se2                                                                                                                                                                                                                                                               | 2d           | 0.3333 | 0.6667 | -0.0752(3) | 1.00 | 0.0554(4)                       |
| Se3                                                                                                                                                                                                                                                               | 2d           | 0.3333 | 0.6667 | 0.4129(3)  | 1.00 | 0.0554(4)                       |

Table S5. Crystallographic data (atomic coordinates, occupancy, and  $U_{\text{iso}}$ ) of  $\text{Ag}_{0.93}\text{BiSe}_2$ , obtained from Rietveld refinements of X-ray synchrotron diffraction.

| $\text{Ag}_{0.93}\text{BiSe}_2$ structure from X-ray powder diffraction (space group $P3m1$ )<br>$a = 4.1951(1) \text{ \AA}$ ; $c = 19.6570(2) \text{ \AA}$ ; 16.1 % $R3m$ ; 1.4 % $\text{Bi}_4\text{Se}_3$<br>Fit residuals ( $R_{\text{wp}}$ , $R_{\text{exp}}$ , $\chi^2$ ): 11.18, 8.89, 1.58 |              |        |        |            |      |                                 |
|---------------------------------------------------------------------------------------------------------------------------------------------------------------------------------------------------------------------------------------------------------------------------------------------------|--------------|--------|--------|------------|------|---------------------------------|
| Atom                                                                                                                                                                                                                                                                                              | Wyckoff Site | $x/a$  | $y/b$  | $z/c$      | Occ. | $U_{\text{iso}} / \text{\AA}^2$ |
| Ag1                                                                                                                                                                                                                                                                                               | 1a           | 0      | 0      | 0          | 1.00 | 0.0750                          |
| Ag2                                                                                                                                                                                                                                                                                               | 2d           | 0.3333 | 0.6667 | -0.3309(2) | 1.00 | 0.0078(6)                       |
| Bi1                                                                                                                                                                                                                                                                                               | 1b           | 0      | 0      | 0.5        | 1.00 | 0.0011(4)                       |
| Bi2                                                                                                                                                                                                                                                                                               | 2d           | 0.3333 | 0.6667 | 0.1609(1)  | 1.00 | 0.0189(6)                       |
| Se1                                                                                                                                                                                                                                                                                               | 2d           | 0      | 0      | 0.2507(2)  | 1.00 | 0.0478(5)                       |
| Se2                                                                                                                                                                                                                                                                                               | 2d           | 0.3333 | 0.6667 | -0.0766(3) | 1.00 | 0.0478(5)                       |
| Se3                                                                                                                                                                                                                                                                                               | 2d           | 0.3333 | 0.6667 | 0.4135(3)  | 1.00 | 0.0478(5)                       |
